# Supplementary material for: A novel long noncoding RNA SP100-AS1 induces radioresistance of colorectal cancer via sponging miR-622 and stabilizing ATG3
Source: Springer Nature journal article supplement (doi:10.1038/s41418-022-01049-1), 2022-08-17
Supplement: MOESM10 [file 41418_2022_1049_MOESM10_ESM.pdf]

**ADMC**

Journal Name:

\_\_\_\_\_

Cell Death & Differentiation

Proposed Title of the Contribution:

|  |
|--|
|  |
|--|

Author(s):

|  |
|--|
|  |
|--|

(the 'Authors')

Please complete the table below to indicate the contributions of all named authors to the manuscript.

[illegible]

Please complete the table below to indicate the contributions of all named authors to the figures.

Figure 1:

|  |
|--|
|  |
|--|

Figure 2:

|  |
|--|
|  |
|--|

Figure 3:

|  |
|--|
|  |
|--|

Figure 4:

|  |
|--|
|  |
|--|

Figure 5:

|  |
|--|
|  |
|--|

Figure 6:

|  |
|--|
|  |
|--|

Signed for and on behalf of the Author(s):

|  |
|--|
|  |
|--|

Print Name:

|  |
|--|
|  |
|--|

Date:

|  |
|--|
|  |
|--|
